# Supplementary material
Source: HighWire-hosted journal article supplement (https://bmjopen.bmj.com/content/15/3/e094230)
Supplement: inline-supplementary-material-2 [file inline-supplementary-material-2.pdf]

Consent Form

Title of clinical study: “Add-on or switch to vibegron in patients with overactive bladder insufficiently responding to initial 4-Week antimuscarinics: A randomized, parallel-group, multicenter trial”

Instructions for use

- ☐ Introduction: About independent clinical research (conflict of interest)
- ☐ Purpose of this study
- ☐ Methods of this study
- ☐ Planned duration of participation in this study
- ☐ Planned number of participants in this study
- ☐ The expected effects of this treatment and the risks of adverse events that may occur.
- ☐ Other treatment options if this treatment is not used.
- ☐ What will happen to your health during this study (financial burden, compensation)?
- ☐ Participation in this study is voluntary.
- ☐ We will keep you informed about this treatment.
- ☐ We may discontinue this treatment.
- ☐ If you participate in this study, your medical records may be examined during or after the study.
- ☐ Your medical records may be examined during or after the study.
- ☐ If the results of this study are made public, your identity will not be revealed.
- ☐ What you must do if you agree to participate in this study
- ☐ About your cost burden
- ☐ About your doctor
- ☐ About the consultation service

[Patient’s signature]

To participate in this study, I have received a full explanation of the above matters, received the consent document, and fully understood the contents.

I have received sufficient explanation on the above points, received the consent document, and fully understood the contents, and I agree to participate in this study.

Patient’s name (Self-signed): \_\_\_\_\_

Name of substitute (signature) (relationship): \_\_\_\_\_

(Signature of physician)

I have fully explained this voluntary clinical research to the above patient.

Date of explanation:        /        /        (year/month/day)

Affiliation

Name (Self-signed):        \_\_\_\_\_

Withdrawal of Consent Form

Title of Clinical Research: “A phase II randomized trial of metastasis-directed therapy with alpha emitter radium-223 in men with oligometastatic castration-resistant prostate cancer”

I was fully informed about the “A phase II randomized trial of metastasis-directed therapy with alpha emitter radium-223 in men with oligometastatic castration-resistant prostate cancer” and agreed to cooperate in the study.

However, I would like to withdraw my consent and refuse any use of my personal data for research purposes unless there is a special reason and I give my consent after receiving an explanation.

(Patient’s signature line)

Date of withdrawal of consent:        /        /        (year/month/day)

Patient’s name (Self-signed):        \_\_\_\_\_

Name of substitute (signature) (relationship):        \_\_\_\_\_

(Signature of physician)

Date of confirmation of withdrawal of consent:        /        /        (year/month/day)

Affiliation

Name (Self-signed):        \_\_\_\_\_

患者さん用

同意撤回書

臨床研究課題名：「抗コリン薬に反応不良な過活動膀胱に対するピベグロンへの切り替えもしくは追加の有効性・安全性を評価する多施設共同無作為化並行群間比較試験」

私は、「抗コリン薬に反応不良な過活動膀胱に対するピベグロンへの切り替えもしくは追加の有効性・安全性を評価する多施設共同無作為化並行群間比較試験」について十分説明を受け、研究協力に同意しましたが、同意の撤回をすることを申し出ます。  
これに伴い、特別な理由があり説明いただいた後に私が了承をしない限り、私の一切の個人データの研究目的での使用を拒否いたします。

【患者さんの署名欄】  
同意撤回日：            年        月        日  
患者氏名： （自署） \_\_\_\_\_

【医師の署名欄】  
同意撤回確認日：            年        月        日  
所属： \_\_\_\_\_  
氏名： （自署） \_\_\_\_\_

医療機関保管用

同意撤回書

臨床研究課題名：「抗コリン薬に反応不良な過活動膀胱に対するピベグロンへの切り替えもしくは追加の有効性・安全性を評価する多施設共同無作為化並行群間比較試験」

私は、「抗コリン薬に反応不良な過活動膀胱に対するピベグロンへの切り替えもしくは追加の有効性・安全性を評価する多施設共同無作為化並行群間比較試験」について十分説明を受け、研究協力に同意しましたが、同意の撤回をすることを申し出ます。  
これに伴い、特別な理由があり説明いただいた後に私が了承をしない限り、私の一切の個人データの研究目的での使用を拒否いたします。

【患者さんの署名欄】

同意撤回日：            年        月        日

患者氏名： （自署） \_\_\_\_\_

【医師の署名欄】

同意撤回確認日：            年        月        日

所属： \_\_\_\_\_

氏名： （自署） \_\_\_\_\_

患者さん用

同意書

東京科学大学病院 病院長 殿

臨床研究課題名：「抗コリン薬に反応不良な過活動膀胱に対するピベグロンへの切り替えもしくは追加の有効性・安全性を評価する多施設共同無作為化並行群間比較試験」

＜説明事項＞

1. はじめに

2. この研究の背景

3. この研究の目的

4. この研究に参加できる方

5. 研究参加人数と参加予定期間

6. この研究の方法

7. 研究参加中に守っていただきたいこと

8. 予想される利益と起こるかもしれない不利益

9. この研究中に、あなたの健康に被害が生じた場合について

10. この研究に参加しない場合の治療方法

11. この研究への参加は、あなたの自由意思によるものです
12. この研究に関する情報の公開

13. この研究への参加を中止させていただく場合があります

14. あなたのカルテなどが研究中あるいは研究終了後に調査されることがあります

15. 試料・情報等の保存について

16. 研究結果を公表する場合も、あなたの身元が明らかになることはありません

17. あなたの費用負担について

18. 研究資金と利益相反

19. この担当医師が、あなたを担当いたします

20. いつでも相談窓口にご相談下さい

21. 認定臨床研究審査委員会

私はこの研究に参加するにあたり、上記の事項について十分な説明を受け、同意説明文書を受け取り、内容等を十分理解いたしましたので、本研究に参加することに同意します。

【患者さんの署名欄】

同意日：            年            月            日

患者氏名：（自署） \_\_\_\_\_

私は、上記患者さんに、この臨床研究について十分に説明いたしました。

【医師の署名欄】

説明日：            年            月            日

所属： \_\_\_\_\_

氏名：（自署） \_\_\_\_\_

医療機関保管用

同意書

東京科学大学病院 病院長 殿

臨床研究課題名：「抗コリン薬に反応不良な過活動膀胱に対するピベグロンへの切り替えもしくは追加の有効性・安全性を評価する多施設共同無作為化並行群間比較試験」

＜説明事項＞

- |                               |                                         |
|-------------------------------|-----------------------------------------|
| 1. はじめに                       | 12. この研究に関する情報の公開                       |
| 2. この研究の背景                    | 13. この研究への参加を中止させていただく場合があります           |
| 3. この研究の目的                    | 14. あなたのカルテなどが研究中あるいは研究終了後に調査されることがあります |
| 4. この研究に参加できる方                | 15. 試料・情報等の保存について                       |
| 5. 研究参加人数と参加予定期間              | 16. 研究結果を公表する場合も、あなたの身元が明らかになることはありません  |
| 6. この研究の方法                    | 17. あなたの費用負担について                        |
| 7. 研究参加中に守っていただきたいこと          | 18. 研究資金と利益相反                           |
| 8. 予想される利益と起こるかもしれない不利益       | 19. この担当医師が、あなたを担当いたします                 |
| 9. この研究中に、あなたの健康に被害が生じた場合について | 20. いつでも相談窓口にご相談下さい                     |
| 10. この研究に参加しない場合の治療方法         | 21. 認定臨床研究審査委員会                         |
| 11. この研究への参加は、あなたの自由意思によるものです |                                         |

私はこの研究に参加するにあたり、上記の事項について十分な説明を受け、同意説明文書を受け取り、内容等を十分理解いたしましたので、本研究に参加することに同意します。

【患者さんの署名欄】 同意日： 年 月 日  
患者氏名：（自署）

私は、上記患者さんに、この臨床研究について十分に説明いたしました。  
【医師の署名欄】 説明日： 年 月 日  
所属：  
氏名：（自署）
